# Supplementary material for: Conceptual Frameworks, Competencies, Contents and Teaching Methods in Planetary Health Education for Health Students and Professionals: A Global Systematic Scoping Review
Source: Research Square preprint supplement (doi:10.21203/rs.3.rs-5683433/v1), 2025-03-28
Supplement: Supplementary file 1 [file 054f77f89bfcc23bb97266be.docx]

**Appendix 3** Characteristics, objectives and elements included in the selected articles.

Studies are shown in chronological order. √ shows in which studies information about framework, competencies, contents or methods is available (Comp: Competencies, Con: contents, F: framework, M: methods, P: P, U: U)

| Article | Main topic | Design | Educational level | Professional profile | Country | Objective of the study | F | Comp | | Con | M |
| --- | --- | --- | --- | --- | --- | --- | --- | --- | --- | --- | --- |
| Gruner et al, 2015 (55) | Global Health | Mixed methods | U | Medicine | USA | Assessing differences between e-learning and face-to-face in improving global health learning. |  | | √ |  | √ |
| Angelos et al, 2016 (23) | One Health | Other | U | Heterogeneous profiles | USA | Design a "one health" framework in food safety and security for future food system workers. | √ | |  | √ |  |
| Valois et al, 2016 (34) | Climate change | Other | Life long | Medicine | Canada | Propose a conceptual framework and an analysis of the needs to prioritize the training of primary school professionals in relation to climate change | √ | | √ | √ | √ |
| Barrett et al, 2016 (65) | Climate change | Other | Various | Heterogeneous profiles | USA | Design a curriculum to help improve your health and reduce your carbon footprint |  | | √ | √ |  |
| Baldwin et al, 2016 (30) | Sustainable development | Other | Life long | Heterogeneous profiles | Thailand  Cambodia  Vietnam  Malaysia | Use the DPSIR framework to explore its potential to train professionals and design solutions adapted to coastal areas. | √ | |  |  | √ |
| Lake et al, 2016 (48) | Planetary Health | Case study | U | Heterogeneous profiles | USA | To present a degree that wants to involve students in participatory research linked to sustainability |  | | √ |  | √ |
| Schwind et al, 2016 (24) | One Health | Transversal | P | Health professionals | USA | Assess the impact of the Envirovet program | √ | |  | √ | √ |
| Rabinowitz et al, 2017 (25) | One Health | Other | U and P | Medicine | USA | Adapt and update the biopsychosocial model to the one health model | √ | | √ | √ | √ |
| Sanyang et al, 2017 (76) | Environmental Health | Qualitative study | Various | Heterogeneous profiles | West Africa | Identify occupational and environmental health challenges and strategies to train professionals in the region. |  | |  | √ |  |
| Richardson et al, 2017 (79) | Environmental Health | Qualitative study | U | Nursery | Great Britain | Measuring the impact of an educational intervention focused on sustainability. |  | |  |  | √ |
| Nussbaum et al, 2017 (66) | Climate change | ACA | U | Psychologists | USA | Develop and evaluate the effectiveness of three texts that refute non-evidence-based messages. |  | |  | √ | √ |
| Burkholder et al, 2017 (49) | Climate change | Pre-post study | U | Heterogeneous profiles | USA | To know to what extent ethics and it contribute to changing the students' view of climate change. |  | | √ | √ | √ |
| Garg et al, 2018 (64) | Environmental Health | Other | U | Medicine | USA | Pilot study incorporating occupational and environmental health into the medical curriculum through problem-based learning. |  | | √ |  | √ |
| Álvarez-Nieto et al, 2018 (62) | Environmental Health | Other | U | Nursery | Spain  Great Britain  Germany | Test and evaluate digital educational materials on environmental sustainability and health (the NurSus Toolkit) in different European countries. |  | | √ |  | √ |
| Lehtonen et al, 2018 (50) | Climate change | Other | U | Heterogeneous profiles | Finland | Present the Climate- now course based on the pedagogy of interconnection in higher education. |  | | √ | √ | √ |
| Buckland et al, 2018 (70) | Climate change | Other | U | Heterogeneous profiles | USA | Present the Power training program Dialogue aimed at training students and giving input to decision-makers on environmental issues. |  | |  | √ | √ |
| Torres-Alzate H et al, 2019 (35) | Global Health | Panoramic review | U | Nursery | Mexico | Present the development process of the Conceptual Framework of Global Health Nursing Competencies. | √ | | √ |  |  |
| Schenk et al, 2019 (31) | Planetary Health | Other | U | Nursery | USA | Design a framework for nursing that reduces the negative impact on the environment of professional practices. | √ | | √ | √ |  |
| Amuguni et al, 2019 (26) | One Health | Other | U | Heterogeneous profiles | Uganda | Describe the process of developing training modules around a health curriculum in Eastern and Southern Africa. | √ | | √ | √ | √ |
| Lemery et al, 2019 (59) | Climate change and health | Other | P | Medicine | USA | Describe a new training in climate and health science policy. |  | | √ |  |  |
| Gilbert et al., 2019 (51) | Systemic thinking | Other | U | Heterogeneous profiles | USA | Describe the systemic thinking module. |  | | √ | √ |  |
| Holbrook et al, 2019 (36) | Climate change | Other | U | Social workers | USA | Present a theoretical framework for the integration of environmental justice in the curriculum of social workers. | √ | | √ |  | √ |
| Creutzig et al, 2020 (84) | Climate change | Other | Life long | Heterogeneous profiles | Germany | Define how active learning can contribute to effective climate change communication. |  | |  |  | √ |
| Wroblewksa et al, 2020 (80) | Sustainable development | Other | U | Engineering | Poland | Describe the experimental use of project-based learning. |  | |  |  | √ |
| Shahmanesh et al, 2020 (37) | public health | Other | U and P | Public health professionals | Great Britain and South Africa | Propose a new approach for infectious disease specialists to incorporate tools, methodologies and knowledge from other disciplines. | √ | |  |  | √ |
| McNabb et al, 2021 (38) | Global Health | Other | Life long | Health professionals | USA | Present relevant aspects of the principles, strategies, and technology that can strengthen global health learning |  | |  |  | √ |
| Philipsborn et al, 2021 (71) | Climate change and health | Other | U and P | Medicine | USA | Present evidence-based content on the relationship between climate change and health. |  | |  | √ | √ |
| RO et al, 2021 (60) | Global Health | Qualitative study | U | Public Health | USA | Examining the achievement of global health competencies in public health professionals. |  | | √ |  | √ |
| Buregyeya et al, 2021 (56) | One Health | Qualitative study | U | Heterogeneous profiles | Uganda | Present student experiences and community impact following experiential trainings. |  | | √ | √ | √ |
| Potter TM, 2021 (19) | Planetary Health | Review | Life long | Nursery | USA | Show how the educational framework of Planetary Health can be used to work on the competencies of nursing training. | √ | | √ | √ |  |
| Marsden et al, 2021 (74) | Climate change and health | Qualitative study | U | Medicine | Great Britain | Identify the challenges identified after piloting a seminar on sustainability. |  | |  | √ |  |
| Jagals et al, 2021 (38) | Climate change and health | Review | Life long | Health professionals | Australia | Present the environmental health skills that health professionals need to acquire. | √ | |  | √ |  |
| Duram LA, 2021 (72) | Climate change | Case study | U | Social Sciences | USA | Present a case study on climate change training in social science students. |  | |  | √ | √ |
| Mbah (52)et al, 2021 (61) | Climate change | Systematic review | Various | Heterogeneous profiles | Great Britain | Review how the knowledge system of the indigenous population helps to adapt to climate change. |  | | √ |  |  |
| Capetola et al, 2022 (20) | Planetary Health | Other | U and P | Health professionals | Australia | Offer two training cases to increase health promotion skills and environmental health competencies. | √ | | √ | √ | √ |
| Asaduzzaman et al, 2022 (90) | Planetary Health | Panoramic review | U and P | Health professionals | Europe, USA and Bangladesh | Identify what training opportunities in Planetary Health are currently available and what challenges and needs there are that need to be addressed. |  | |  |  | √ |
| Jacobsen et al, 2022 (32) | Global Health | Review | U and P | Health professionals | USA | Identify key domains for global health training. | √ | |  |  |  |
| Armstrong et al, 2022 (39) | Planetary Health | Other | U | Medicine | East Africa | Provide a conceptual framework that integrates all aspects of population health: public health, health systems, global health and Planetary Health | √ | |  | √ | √ |
| Liu et al, 2022 (68) | Climate change and health | Qualitative study | U | Medicine | USA | To analyse the perceptions of the first cohort of students on climate change and health. |  | |  | √ | √ |
| Dambre et al, 2022 (83) | Planetary Health | Qualitative study | U | Heterogeneous profiles | Netherlands | To analyse the feedback from students of a course on Planetary Health within the framework of a degree on global responsibility and leadership. |  | |  |  | √ |
| Oerther et al, 2022 (28) | Environmental Health | Other | U | Nursery | USA | Show two examples of interprofessional training in environmental education | √ | |  |  | √ |
| Schmeltz et al, 2022 (81) | Climate change | Other | U | Public Health | USA | Show three case studies in which the problem-based methodology has been used in the impact of climate change on local communities. |  | |  |  | √ |
| Oe et al, 2022 (40) | Sustainable development | Qualitative study | U | Not specified | Japan | Define a model of education for development and show how learning initiatives in the community can be very effective. | √ | |  |  | √ |
| Fia et al, 2022 (29) | Sustainable development | Systematic review | U | Heterogeneous profiles | Italy | Synthesize educational resources to work around the ODS. | √ | |  |  | √ |
| Agusdinata DB, 2022 (41) | Sustainable development | Other | U and P | Heterogeneous profiles | Indonesia | Present a conceptual framework and a case study in which the university leads the co-creation of solutions related to SDGs 1, 2 and 3. | √ | | √ |  |  |
| De-Abreu et al, 2022 (42) | Environmental education | Qualitative study | U and P | Heterogeneous profiles | USA | Designing an environmental science curriculum collaboratively between Western and Indigenous traditions. | √ | |  | √ | √ |
| Leimbach et al, 2022 (67) | Climate change | Other | P | Heterogeneous profiles | Australia | Explain the development of the Climate Crisis and Action course. |  | |  | √ | √ |
| Wilby et al, 2022 (63) | Global citizenship | Qualitative study | U | Pharmaceuticals | New Zealand | Develop a curriculum aimed at pharmacists to deal with the challenges of global citizenship. |  | | √ | √ | √ |
| Lee et al, 2022 (69) | Planetary Health | Other | U | Medicine | Ireland | Develop a conceptual framework for Planetary Health. |  | |  | √ |  |
| McAlister et al, 2022 (52) | Environmental Health | Other | Life long | Heterogeneous profiles | USA | Make hypotheses about why systemic thinking is a persistent trend in learning processes |  | | √ |  | √ |
| Canosa et al, 2022 (58) | Climate change and health | Other | U | Heterogeneous profiles | USA | Examine the correlations between a sustainable living lab and leadership in addressing climate change. |  | | √ | √ | √ |
| Slimings et al, 2022 (85) | Planetary Health | Mixed methods | U | Medicine | Australia | Mapping existing Planetary Health topics in the ANU Medical School curriculum and evaluating the effectiveness of two pilot tests. |  | |  |  | √ |
| Ezekiza et al, 2022 (77) | Global Health | Qualitative study | U | Other health professionals | Canada | Assess student feedback on the ODS narrative to determine its impact on learning experiences. |  | |  | √ | √ |
| O'Callaghan et al, 2022 (54) | Planetary Health | Other | P | Heterogeneous profiles | Spain | Describe the main characteristics of an online master's program and discuss the challenges of its implementation. | √ | | √ | √ | √ |
| Caron et al, 2023 (43) | Public Health | Other | U and P | Heterogeneous profiles | USA | Identify the strengths and shortcomings in population health in the established public health curriculum. | √ | |  |  |  |
| Vandenberg SY, 2023 (21) | Planetary Health | Other | P | Nursery | Canada | Adapt the Planetary Health curriculum to current nursing training. | √ | | √ |  |  |
| Field et al, 2023 (78) | Sustainable development | Qualitative study | U | Oral Health | Great Britain  Israel  Sweden  France | Report the European consensus on how to work on environmental sustainability in the training curriculum for dentists. |  | |  |  | √ |
| Flaten et al, 2023 (22) | Planetary Health | Qualitative study | U and P | Nursery | USA | Highlight the importance of Planetary Health in the nursing curriculum and show an example. | √ | | √ |  | √ |
| Buckley et al, 2023 (44) | Sustainable development | Review | U | Heterogeneous profiles | USA | Identify how the ODS can be used to effectively operationalize the concept of sustainability. | √ | | √ |  | √ |
| Hess et al, 2023 (57) | Sustainable development | Other | U | Occupational therapists | Great Britain | Contribute to raising the awareness of occupational therapists about Planetary Health. |  | | √ |  |  |
| Sanders et al, 2023 (53) | Systemic thinking | Mixed methods | U | Heterogeneous profiles | USA | Explore the use of cases in the study of food systems in order to increase systemic thinking. |  | | √ |  | √ |
| MacKenzie-Shalders et al (47) | Planetary Health | Panoramic review | Life long | Health professionals | Australia | Describe the conceptual frameworks of Planetary Health among health professionals. | √ | |  |  |  |
| Droubi et al, 2023 (45) | Sustainable development | Other | U | Heterogeneous profiles | Great Britain | Provide a conceptual framework to guide education towards a just transition. | √ | | √ |  |  |
| Martindale et al, 2023 (82) | Sustainable development | Other | P | Social Sciences | Great Britain | Propose the use of climate, soil, energy and water (CLEW) models as a strategy to work on nexus thinking. |  | |  |  | √ |
| Versini et al, 2023 (75) | Sustainable development | Mixed methods | P | Heterogeneous profiles | France | Analyze the contents of nature-based solutions at master's level. |  | |  | √ |  |
| Okada et al, 2023 (33) | Climate change | Qualitative study | U and P | Heterogeneous profiles | Great Britain | Explore the challenges of implementing the CARE-KNOW-Do framework | √ | | √ |  |  |
| Lansbury et al, 2023 (91) | Climate change and health | Other | U | Heterogeneous profiles | Australia | Understanding students' motivations for taking a climate change and health course. |  | |  | √ |  |
| Maldonado et al, 2023 (92) | Climate change | Qualitative study | U | Heterogeneous profiles | Mexico | Explore and analyze the possibilities of integrating climate change in various formations. |  | |  | √ |  |
| Acosta et al, 2024 (86) | One Health | Other | U | Other health professionals | USA | Investigate whether a simulation activity could be effective in achieving global health training objectives |  | | √ |  | √ |
| Rosenau et al, 2024 (73) | Planetary Health | Qualitative study | U | Heterogeneous profiles | Germany | Introducing the Planetary Health diet in a cohort of students from various programs |  | | √ | √ | √ |
| Baines et al, 2024 (27) | One Health | Qualitative study | U | Veterinarians | USA | Introduce the skills of a health in the training of the veterinary degree. | √ | | √ | √ |  |
| Telesford et al, 2024 (87) | Environmental Health | Other | U | Public Health | Grenada (Caribbean) | Case study adapted to the reality of the Caribbean islands to advance environmental health competencies. |  | | √ |  | √ |
| Tomassi et al, 2024 (46) | Environmental Health | Other | Life long | Heterogeneous profiles | Europe | Develop a framework that is aligned with the European Qualifications Framework and the Great Green Deal. | √ | | √ | √ |  |
